# Supplementary material
Source: Springer Nature journal article supplement (https://www.springermedizin.de/resource/supplementary/12882_2014_834_MOESM2_ESM.docx/9454414)
Supplement: MOESM2 [file 9454414]

Table3. Biological characteristics of subjects

| Variable | whole group | HAART group | Naïve group | p |
| --- | --- | --- | --- | --- |
| Fasting glycaemia | 103,5 ± 14,4 | 104,2 ±15,1 | 100,3 ± 10,6 | 0,27 |
| Hemoglobin | 13,3 ± 2,0 | 13,5 ± 1,9 | 12,7 ± 2,2 | 0,01 |
| HBs Ag positive | 5 (1,9) | 5 (2,1) | 0 (0) | 0,44 |
| Anti HCV positive | 3 (1,2) | 1 (0,4) | 2(0,9) | <0,0001 |
| CD4 (cells/mm3increment):   - < 200 - 200-499 - > 500 | 22 (10,7)  96 (46,8)  87 (42,4) | 14 (6,8)  80 (39)  66 (32,2) | 8 (3,9)  16 (7,8)  21 (10,2) | 0,50  0,034  0,089 |

Variables are absolute numbers and relative frequencies or means plus the standard deviation (SD) as appropriate. CD4: cluster of differentiation.
